# Supplementary material
Source: PubMed Central journal article supplement (PMC3181375)

### Intracellular IL-17 staining

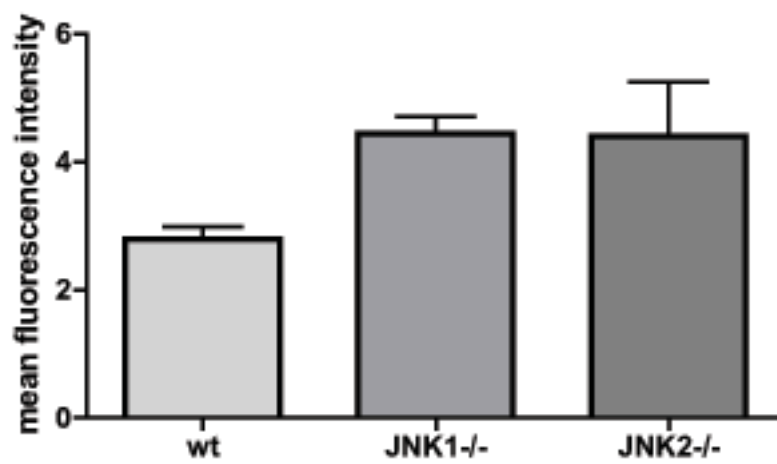

Supplement: mmc1.pdf [file mmc1.pdf]

Supplementary Figure S2

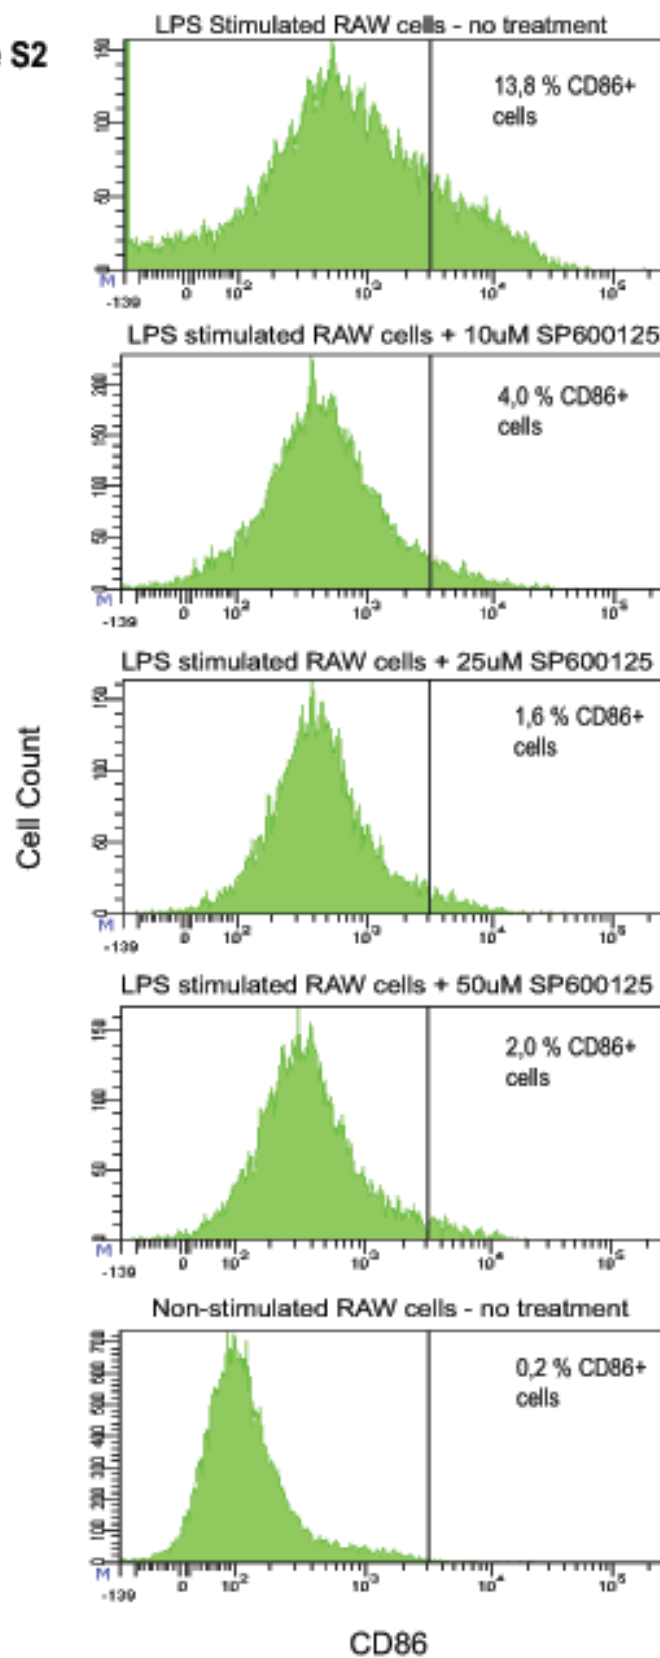

Supplement: mmc2.pdf [file mmc2.pdf]
